# Supplementary material for: Identification of RAS mutant biomarkers for EGFR inhibitor sensitivity using a systems biochemical approach
Source: PubMed Central journal article supplement — Cell Rep. Author manuscript; Available in PMC 2022 Feb 24. (PMC8867612; doi:10.1016/j.celrep.2021.110096), 2021-12-14
Supplement: NIHMS1764636-supplement-1.pdf [file NIHMS1764636-supplement-1.pdf]

**Cell Reports, Volume 37**

**Supplemental information**

**Identification of RAS mutant biomarkers  
for EGFR inhibitor sensitivity using  
a systems biochemical approach**

**Thomas McFall and Edward C. Stites**

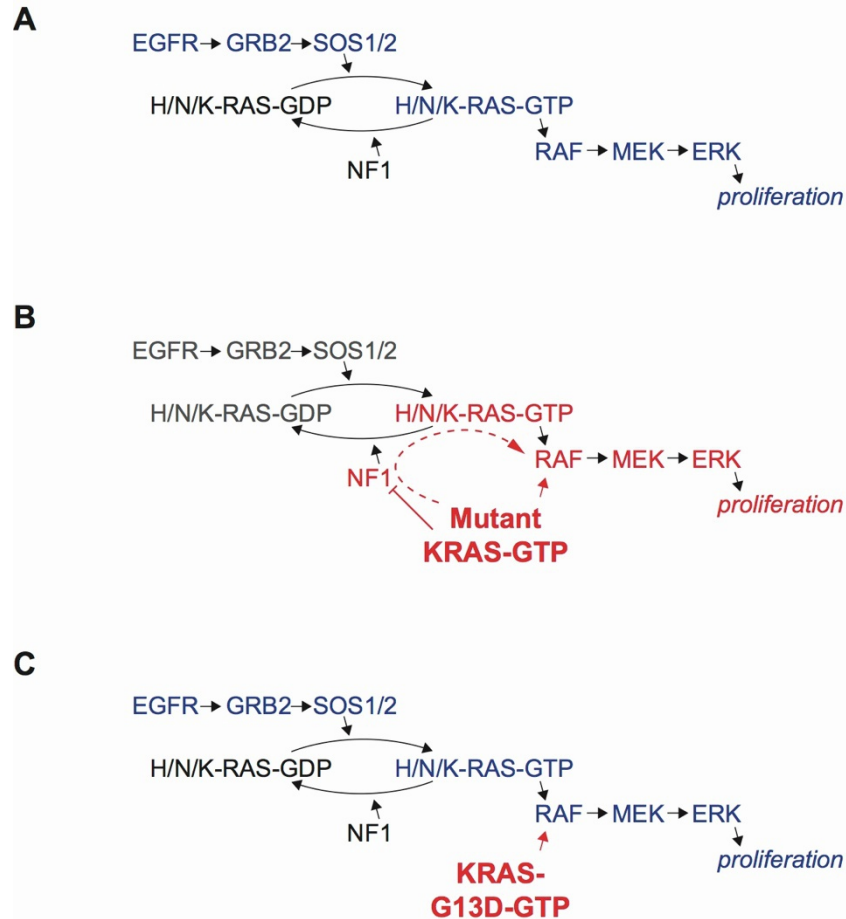

**Figure S1**

**Figure S1. The mechanism of *KRAS* G13D sensitivity to EGFR inhibition that was uncovered in our previous work. Related to Figure 1. (A)** The EGFR pathway leads to activation of the RAS GTPases (K/N/H-RAS) and the RAS downstream effector pathways, including the RAF/MEK/ERK MAPK cascade. **(B)** The most common constitutively active RAS mutations can activate the RAF/MEK/ERK cascade directly. Most RAS mutants can also indirectly activate the RAF/MEK/ERK cascade by competitively inhibiting the RAS GAP and RAS signal negative regulator NF1. Decreased NF1 activity results in increased wild-type RAS-GTP activation that can also promote RAF/MEK/ERK activation. Both the direct and indirect activation of RAF/MEK/ERK signaling here occur in an EGFR independent manner. **(C)** *KRAS* G13D is constitutively active, but impaired at binding to NF1. Thus, it can partially activate the RAF/MEK/ERK cascade. Full activation of the RAF/MEK/ERK cascade (i.e. at a level comparable to *KRAS* G12V or *KRAS* G12D) requires another signal, like EGFR induction, to activate wild-type RAS-GTP.

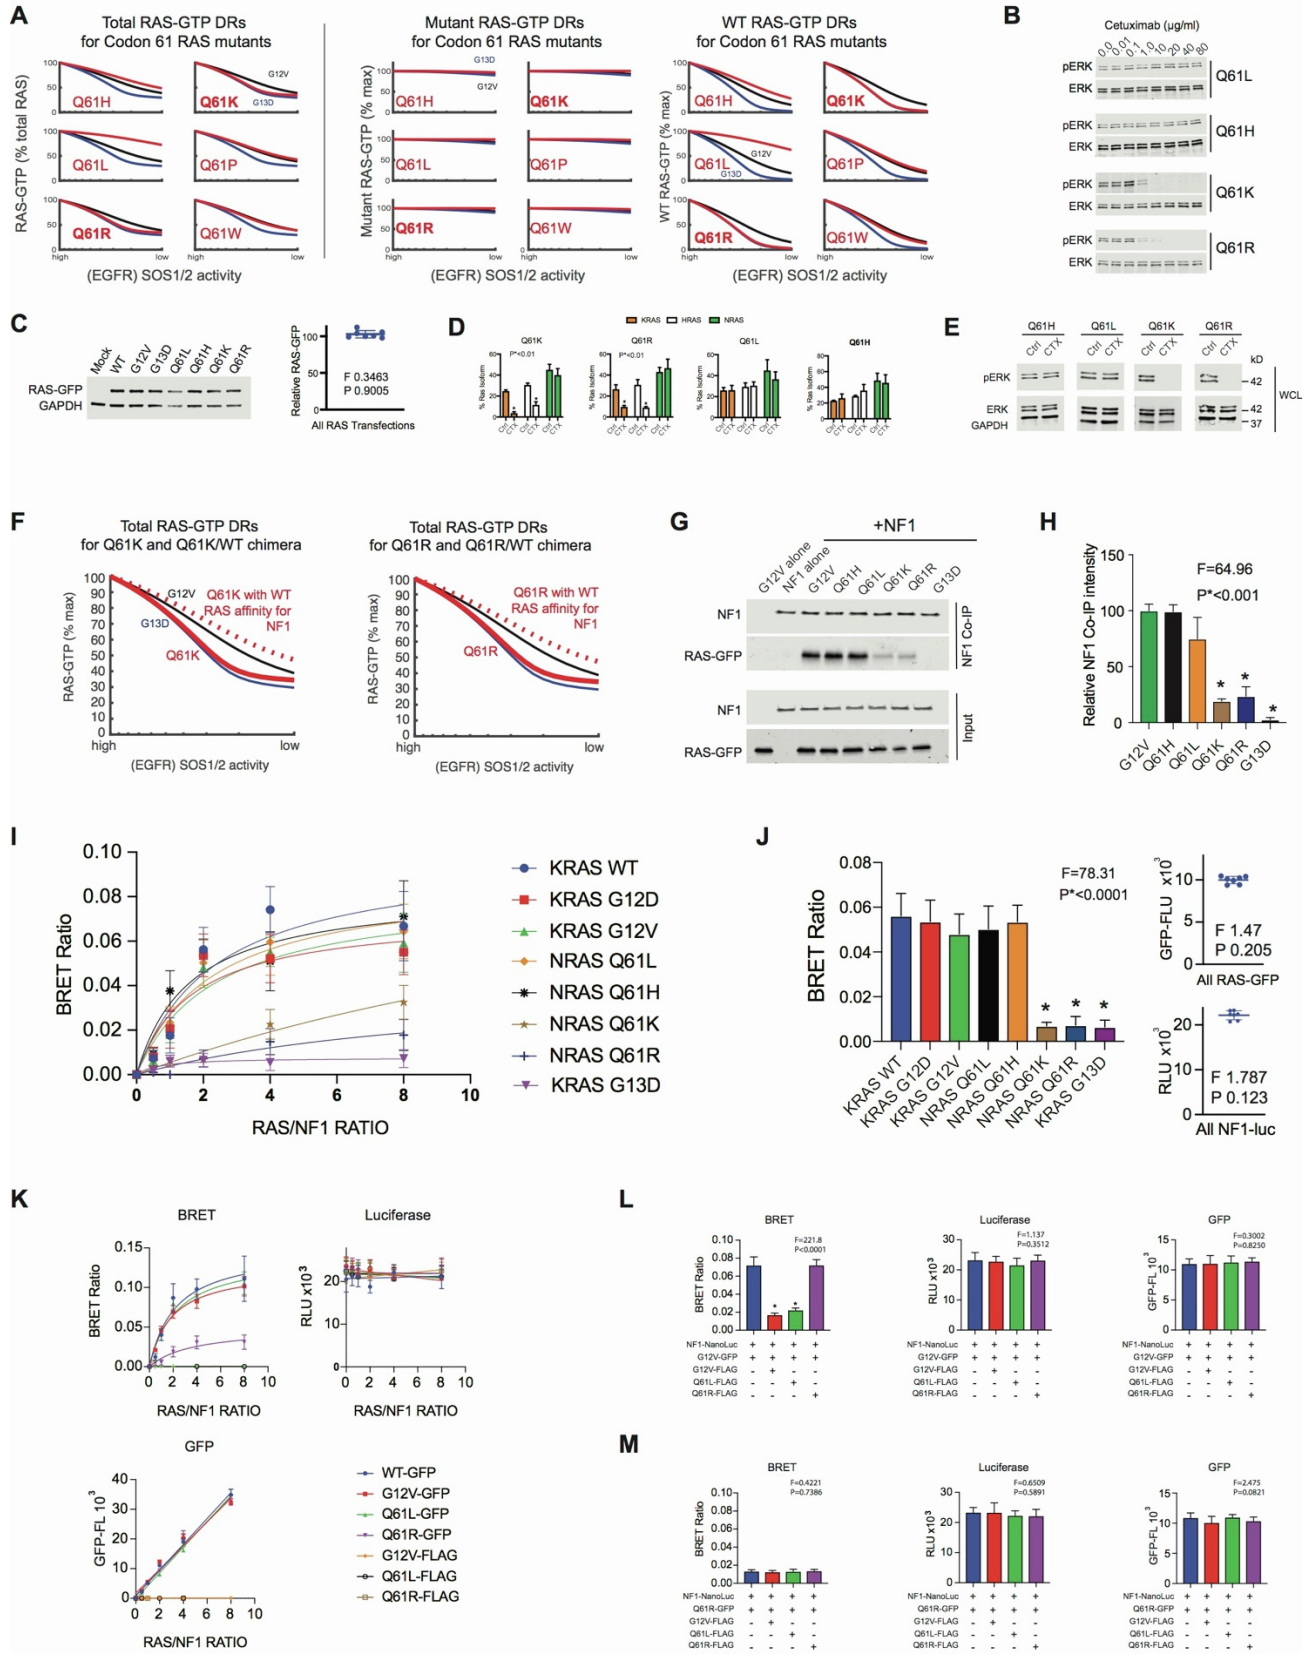

Figure S2

**Figure S2. Supplementary investigations of the sensitivity of cells and networks with an *NRAS* codon 61 mutation to EGFR inhibition. Related to Figure 2.** (A) Simulated dose responses for six codon 61 RAS mutants (red), compared to G13D (blue) and G12V (black) mutants. Measures of model output considered are total RAS-GTP (left), mutant RAS-GTP (middle), and wild-type RAS-GTP (right). (B) Immunoblots of *NRAS* Q61L, Q61H, Q61K and Q61R SW48 isogenic treated indicated doses of cetuximab (48 h). Experiment was performed once (N=1) to confirm MTT proliferation assay (Figure 2C). (C) Immunoblots of RAS mutant expression (left). Relative values of RAS-GFP were normalized to GAPDH, and ratios of RAS to GAPDH were further normalized to the WT RAS lane (100%) (right). Each data point represents the average expression across three separate experiments (N=3). One-way ANOVA was performed and no statistical difference in RAS expression across transfections was observed. (D) Quantification of RAS-GTP levels from RBD-IEF. Data points and error bars represent mean  $\pm$  SD from three separate experiments (N=3), of which Figure 2G is a representative example. Statistical significance was determined with the unpaired two-tailed t-test. P\* indicates a significance of  $<0.01$ . (E) ERK phosphorylation measurements made in parallel with the RBD-IEF experiment shown in Figure 2G. (F) Simulated EGFR (SOS) inhibition dose responses for Q61K and Q61R mutants with their measured affinity reduction for NF1 (red solid line), and with their impaired affinity replaced with the affinity of WT RAS for NF1 (red dashed line). Simulated dose responses for G13D (blue) and G12V (black) mutants are also presented. (G) Coimmunoprecipitation of NF1 with *NRAS* Q61H, Q61L, Q61K, Q61R and *KRAS* G13D and G12V from mixtures of lysates from *NF1*-transfected cells with lysates from *RAS*-transfected cells. Western blot is representative for three independent experiments (N=3). (H) Normalized densitometry from three independent NF1-CoIP. Data points and error bars represent mean  $\pm$  SD amongst three independent experiments (N=3). Statistical difference was determined by one-way ANOVA followed by post-hoc Tukey's test for multiple comparisons. P\* values indicate a significance of  $<0.001$  when compared against *KRAS* G12V. (I) HEK293T cells were transfected with *NF1-NanoLuc* and with increasing concentrations of *RAS-GFP* at the ratio indicated. Data represents BRET ratio  $\pm$  SD from eight biological replicates (n=8). BRET saturation curves are from one representative experiment from three independent experiments (N=3). (J) Data represent BRET ratio  $\pm$  SD from eight biological replicates (n=8). BRET value is a single point from the BRET curve (Panel A) at a 2:1 concentration of *RAS-GFP*: *NF1-NanoLuc* expression constructs. Statistical difference was determined by one-way ANOVA followed by post-hoc Tukey's test for multiple comparisons. P\* values indicate a significance of  $<0.0001$  when compared against *KRAS* WT. The small distribution plots on the right show average luciferase and GFP fluorescence units, indicating equal amounts of *NF1-NanoLuc* and *RAS-GFP* expression across transfections. Each data point represents the average signal across eight biological replicates (n=8). One-way ANOVA was performed and no statistical difference was observed. (K) Flag-tagged and GFP-tagged *KRAS* proteins were analyzed for BRET signal with *NF1-NanoLuc* (top left). *NF1-NanoLuc* expression was held constant throughout the BRET saturation curve as indicated by equal levels of luciferase units (top right). Increasing levels of GFP signal correspond with an increasing quantity of *RAS-GFP* construct transfection (bottom left). (L) Evaluation of the ability of Flag-tagged *KRAS* G12V, Q61L, and Q61R to compete with *KRAS* G12V-GFP for binding to NF1 (left). Equal amounts of luciferase (middle) and GFP (right) were observed, suggesting equal amounts of expression that followed from the transfection of equal amounts of the respective constructs. Data represents the average signal  $\pm$  SD across eight biological replicates (n=8), and are representative of three experiments (N=3). One-way ANOVA was performed followed by post-hoc Tukey's test for multiple comparisons. P- and F values are indicated. (M) Evaluation of the ability of Flag-tagged *KRAS* G12V, Q61L, and Q61R to compete with *NRAS* Q61R-GFP for binding to NF1(left). Equal amounts of luciferase (middle) and GFP (right) were observed, suggesting equal amounts of expression that followed from the transfection of equal amounts of the respective constructs. Data represents the average signal  $\pm$  SD across eight biological replicates (n=8), and are representative of three experiments (N=3). One-way ANOVA was performed followed by post-hoc Tukey's test for multiple comparisons. P- and F values are indicated.

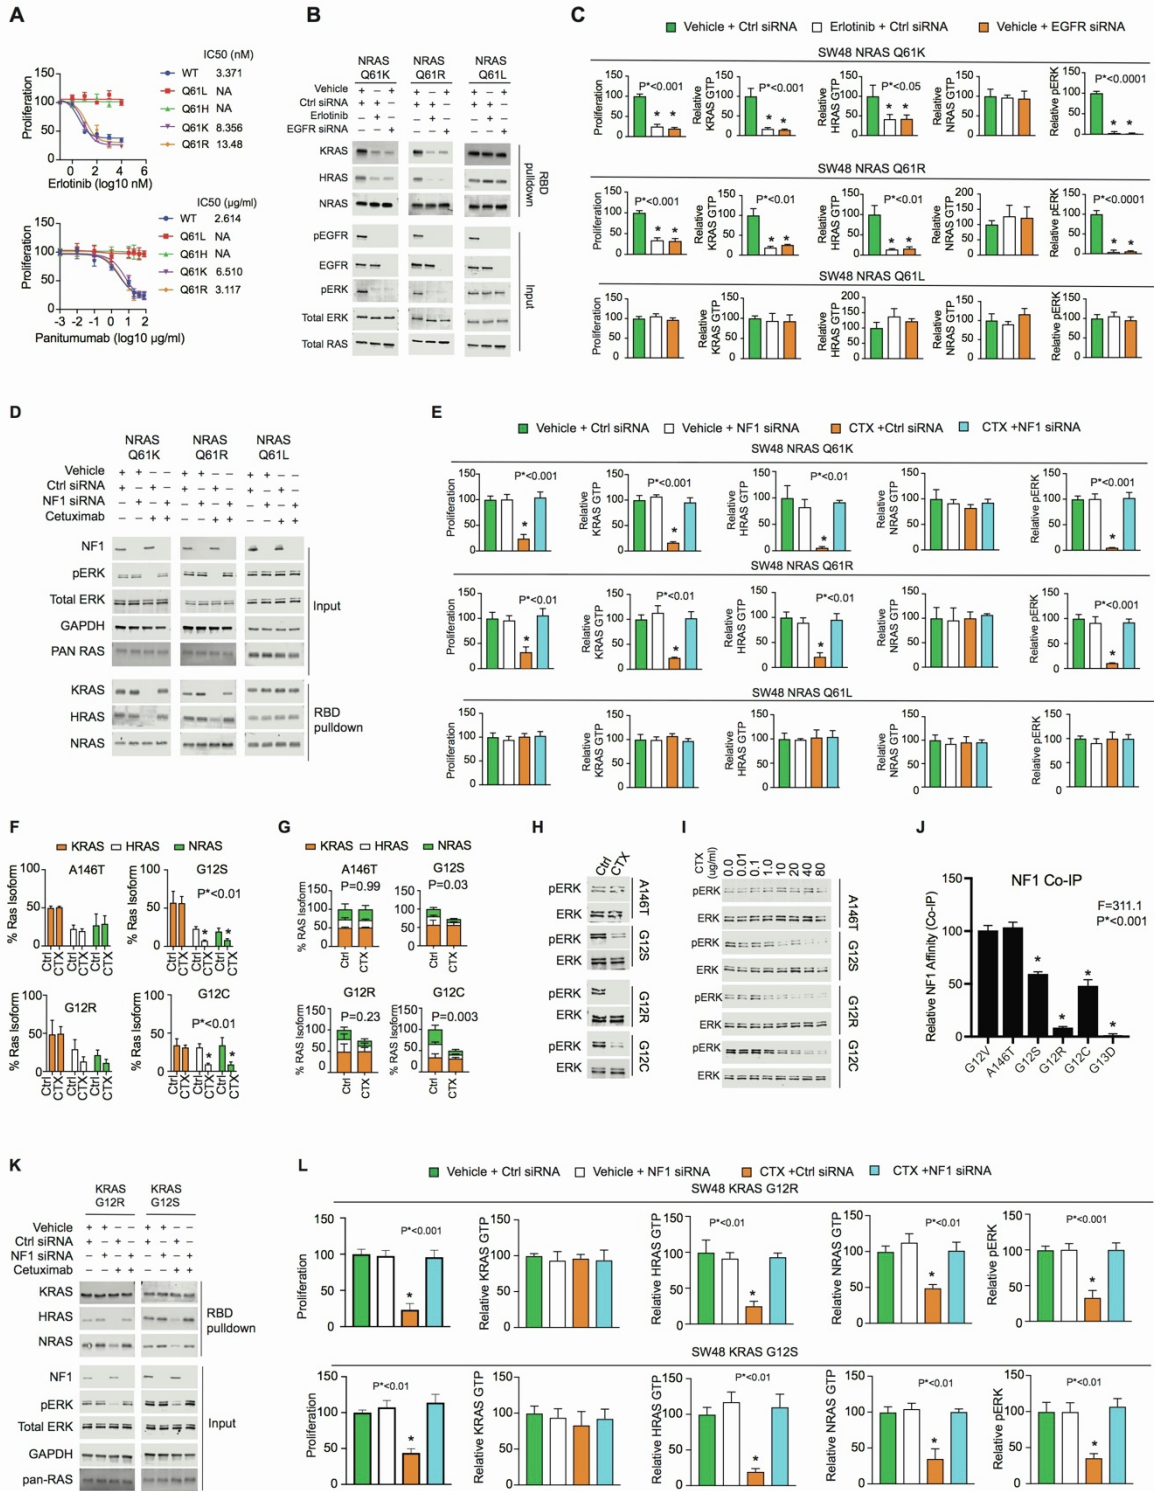

Figure S3

**Figure S3. Empirical investigations of the sensitivity of *NRAS* and *KRAS* mutant isogenic SW48 cells to EGFR inhibition. Related to Figure 2 and Figure 3. (A)** Drug dose response MTT assays for *NRAS* Q61K, Q61R, Q61L, and Q61H isogenic SW48 cells that were treated with erlotinib (top) or panitumumab (bottom). Data points represent mean  $\pm$  SD. Dose response is representative of three independent experiments (N=3). **(B)** Immunoblots of whole cell lysates and RBD-pull down lysates for *NRAS* Q61K Q61R, and Q61L SW48 cells. **(C)** Quantifications of proliferation (MTT assay), RAS-GTP levels (immunoblot), and ERK phosphorylation (immunoblot) for *NRAS* Q61K, Q61R, and Q61L isogenic SW48 cells treated with erlotinib, *EGFR* siRNA, or control siRNA. Data points represent mean  $\pm$  SD from three separate experiments (N=3), for which Figure S3B is a representative example of the immunoblots. Proliferation measurements for these same conditions were made separately and are presented here. Statistical significance was determined by performing one-way ANOVA followed by post-hoc Tukey's test for multiple comparisons between untreated and treated conditions. P values are indicated. **(D)** Immunoblots of whole cell lysates and RBD-pull down lysates for *NRAS* Q61K, Q61R, and Q61L genotype isogenic SW48 cells that were treated with cetuximab (or not) and also treated with *NF1* siRNA or control siRNA. **(E)** Quantification of isoform specific RAS-GTP levels from RBD pulldown, and of ERK phosphorylation. Proliferation measurements for these same conditions were made separately and are presented here. Data points represent mean  $\pm$  SD from three separate experiments (N=3). Statistical difference was determined by one-way ANOVA followed by post-hoc Tukey's test for multiple comparisons. **(F)** Quantification of RAS-GTP levels RBD-IEF. Data points represent mean  $\pm$  SD from three separate experiments (N=3), for which Figure 3C was a representative example. Statistical significance was determined by performing unpaired two-tailed t-test between untreated and treated conditions for each isoform specific RAS-GTP for each cell line. P\* indicates a significance of <0.01. **(G)** RAS-GTP levels as a scaled fraction of total RAS-GTP from RBD-IEF. Data points represent mean  $\pm$  SD from three separate experiments (N=3). Statistical significance was determined by performing unpaired two-tailed t-test between untreated and treated conditions for total RAS-GTP. P-values are indicated within the figure. **(H)** ERK phosphorylation measured in cetuximab treated and non-treated cells that was performed in parallel with the RBD-IEF measurements shown in Figure 3C. **(I)** Immunoblots of *KRAS* A146T, G12R, G12S and G12C SW48 isogenic cells were treated with increasing doses of cetuximab for 48h. Dose response western blot was performed once (N=1) to confirm MTT proliferation assay (Figure 3A). **(J)** Normalized densitometry from three independent *NF1*-CoIP experiments representing relative *NF1* affinity *in vitro* from Figure 3D. Bar heights and error bars represent mean and standard deviation amongst three independent experiments (N=3). Statistical difference was determined by one-way ANOVA followed by post-hoc Tukey's test for multiple comparisons. P\* indicate a significance of <0.001 when compared against *KRAS* G12V. **(K)** Immunoblots of whole cell lysates and RBD-pull down lysates for *KRAS* G12R and G12S isogenic SW48 cells that were treated with cetuximab (or not) and also treated with *NF1* or control siRNA. **(L)** Quantification of isoform specific RAS-GTP levels from RBD pulldown, and of ERK phosphorylation. Proliferation measurements for these same conditions were made separately and are also presented here. Data points represent mean  $\pm$  SD from three separate experiments (N=3). Statistical difference was determined by one-way ANOVA followed by post-hoc Tukey's test for multiple comparisons.

**A**

- k\_1: GTPase activity rate constant
- k\_2: GDP dissociation rate constant
- k\_3: GTP dissociation rate constant
- k\_4: GDP association rate constant
- k\_5: GTP association rate constant
- k\_6:  $k_{cat}$  for GAP activity on RAS**
- k\_7:  $K_m$  for GAP activity on RAS
- k\_8: effector binding rate constant
- k\_9: effector unbinding rate constant
- k\_10:  $k_{cat}$  for GEF activity on RASGDP
- k\_11:  $K_m$  for GEF activity on RASGDP
- k\_12:  $K_m$  for GEF activity on RASGTP
- k\_13:  $k_{cat}$  for GEF activity on RASGTP
- k\_14:  $K_d$  for RAS-effector interaction

**B**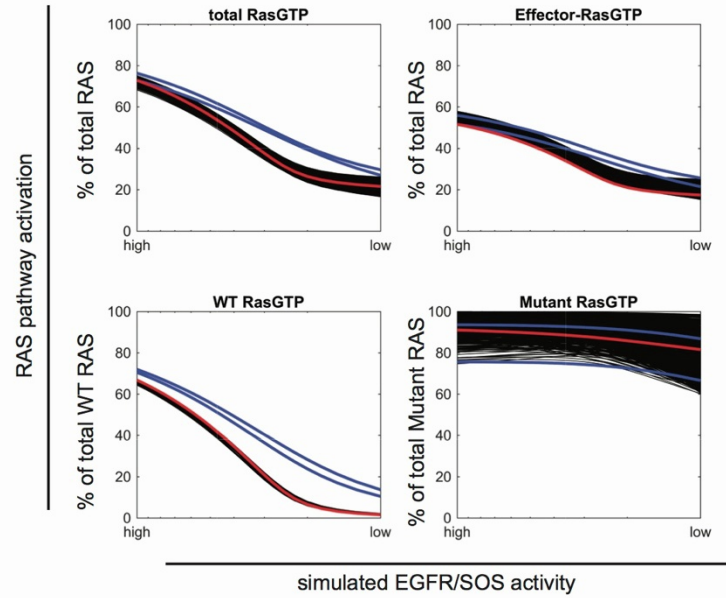**C**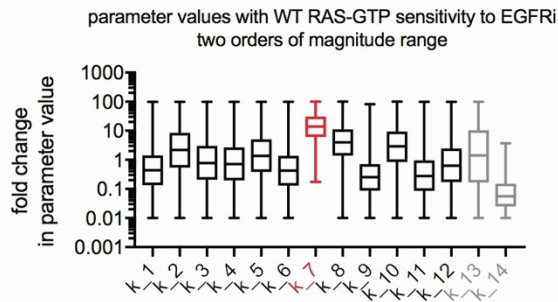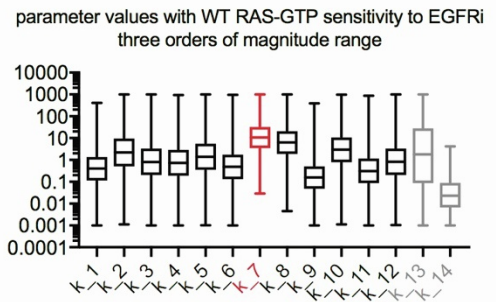**D**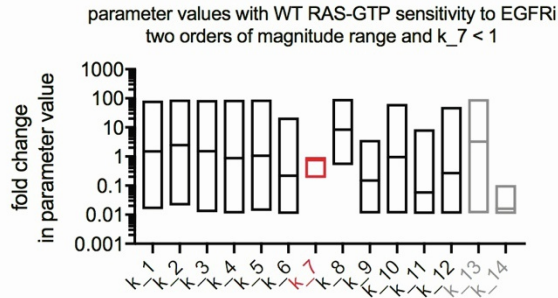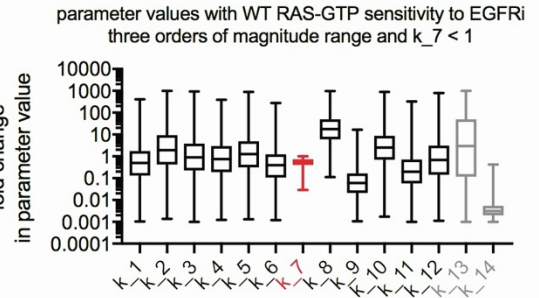**Figure S4**

**Figure S4. Computational analysis of possible mechanisms for EGFR inhibitor sensitivity within RAS mutant networks. Related to Figure 4.** (A) Table providing definitions of each of the fourteen reaction parameters that characterize a RAS mutant within the RAS model. The  $K_m$  for the interaction between NF1 and a RAS mutant, which was found to be the most important parameter for determining whether a network is EGFRi sensitive, is indicated in red. The two parameters indicated in gray are dependent parameters that are composites of the other parameters. (B) Simulated EGFR/SOS inhibition dose responses (black lines) for all of the computational RAS mutants that are sensitive to EGFR inhibition within a collection of one million computational-random-RAS mutants where each of the RAS mutant parameters are within one order of magnitude from the parameter values of WT RAS for the same reaction. For comparison, the simulated dose response of G13D (red) and G12D and G12V (both blue) are presented. (C) Parameters from all of the parameter sets that resulted in EGFR inhibitor sensitivity through WT RAS-GTP reduction but not mutant RAS-GTP reduction. Parameters are presented normalized to the value of the same parameter for WT RAS. These data are like the data in Figure 4F, but for a collection of one million computational-random-RAS mutants where each of the RAS mutant parameters is within two orders of magnitude from the parameter value of WT RAS (left) or within three orders of magnitude (right). (D) Parameters from all of the parameter sets in Figure S8C, but further limited to those parameter sets that also have a  $K_m$  value for the NF1 interaction with mutant RAS that was less than the value of the  $K_m$  between NF1 and WT RAS.



**A**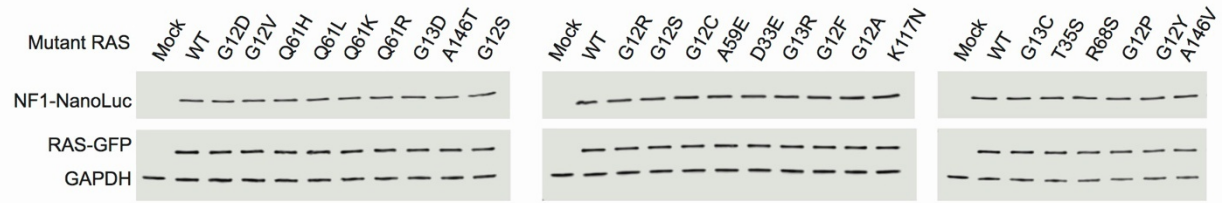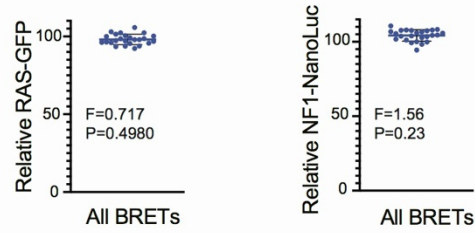**B**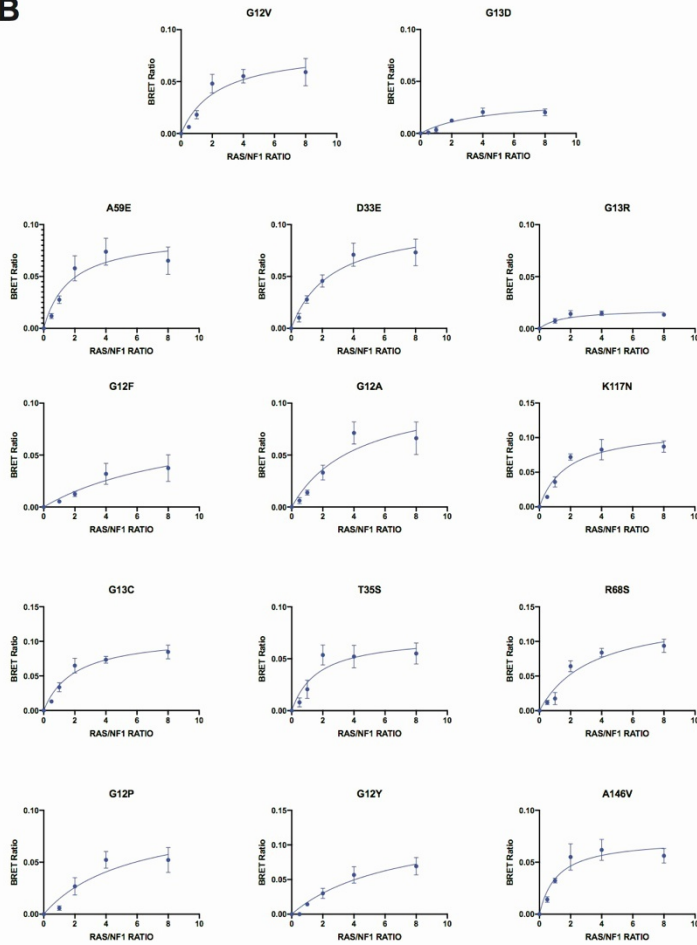**C**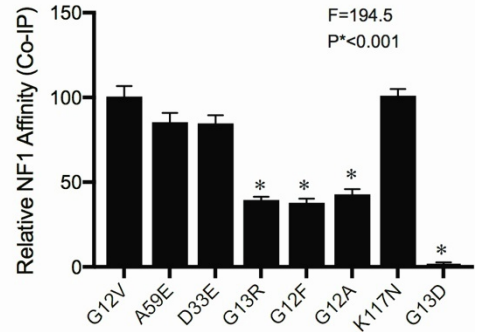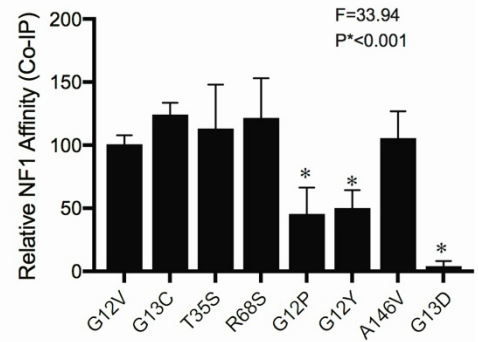**D**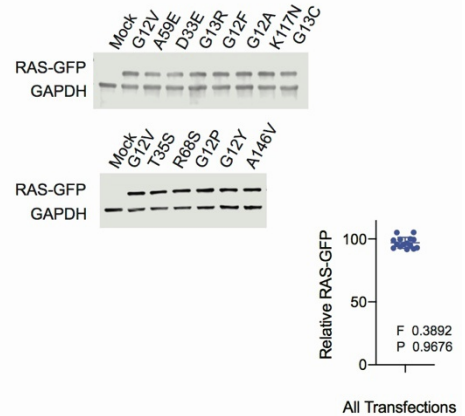**Figure S5**

**Figure S5. Supplementary data from the empiric screening of twelve KRAS mutants for binding to NF1. Related to Figure 5.** (A) Evaluation of KRAS expression after HEK-293T cells were transfected with same quantity of DNA for the indicated *RAS-GFP* and *NF1-NanoLuc* constructs. KRAS-GFP expression was normalized to GAPDH as an internal protein loading control and to the WT-lane (100%) for an external reference to compare across western blots. RAS-GFP expression from the three western blots show little variation and each data point represents RAS expression for each mutant (bottom left). Mean and standard deviation of expression from all RAS-GFP transfections from within each western blot were calculated, one-way ANOVA was performed, and no statistical difference in expression was observed in RAS-GFP expression across western blots (bottom left). NF1-NanoLuc expression was normalized to GAPDH as an internal protein loading control, and to the WT-lane for an external reference (100%) to compare expression across western blots. NF1-NanoLuc expression from the three western blots show little variation (bottom left). Mean and standard deviation of expression from all NF1-NanoLuc transfections from each western blot were calculated, one-way ANOVA was performed, and no statistical difference in expression was observed across western blots (bottom left). P- and F-Values are reported for comparison. Each western blot was performed once (N=1). (B) Full BRET saturation curves that provided the source data for Figure 5B (2:1 RAS:NF1 transfection ratio). HEK293T cells were transfected with NF1-NanoLuc and with increasing concentrations of the indicated *RAS-GFP* construct. BRET curves for KRAS G12V and KRAS G13D, which have previously been shown to display approximately wild-type levels of NF1 binding and reduced NF1 binding, respectively, are included for comparison. Data represent BRET ratio  $\pm$  SD from eight biological replicates (n=8) BRET saturation curves are a single representative experiment of three independent experiments (N=3). (C) Normalized densitometry from three independent NF1-CoIP experiments representing relative NF1 affinity *in vitro*, of which Figure 5C is one representative example. Bar heights represent mean  $\pm$  SD amongst three independent experiments (N=3). Statistical difference was determined by one-way ANOVA followed by post-hoc Tukey's test for multiple comparisons. P\* indicate a significance of <0.001 when compared against KRAS G12V. (D) Evaluation of RAS expression after SW48 *WT* cells were transfected with same quantity of mutant *RAS-GFP* constructs pertaining to Figure 5B. RAS-GFP expression was normalized to GAPDH for internal protein loading control and to G12V-RAS-GFP (100%) for an external reference to compare across western blots. Each data point on the distribution plot represents mean expression of each mutant RAS from three separate experiments (N=3). One-way ANOVA was performed to compare all mutants against each other, and no significant difference was observed as reported by P- and F- values.

**A**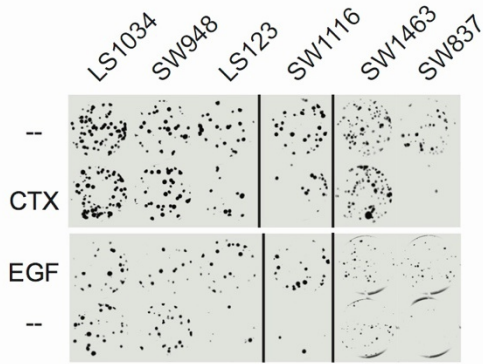**B**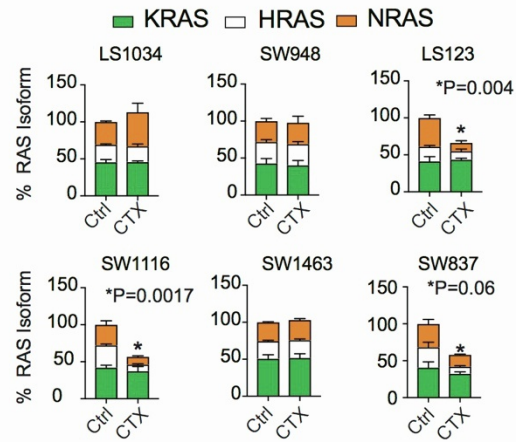**C**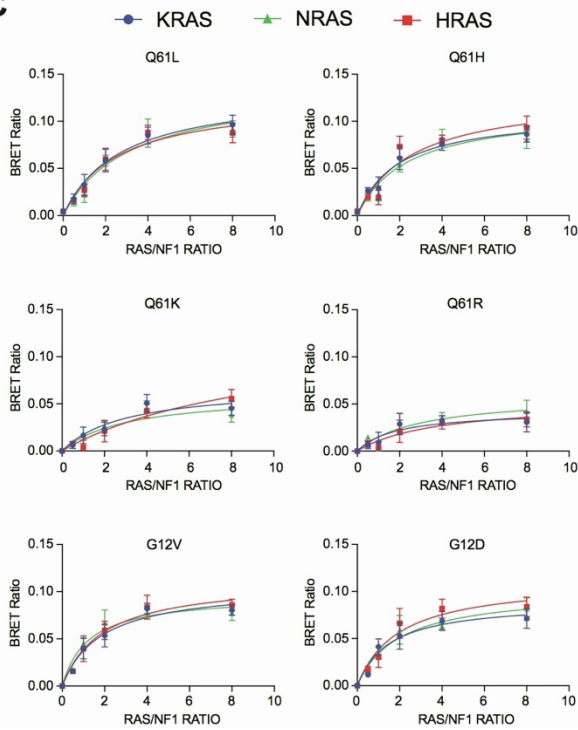**D**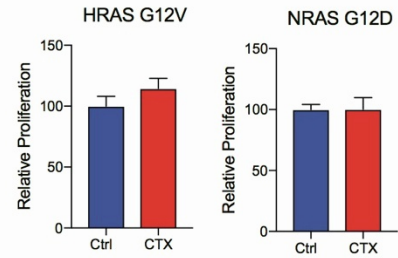**E**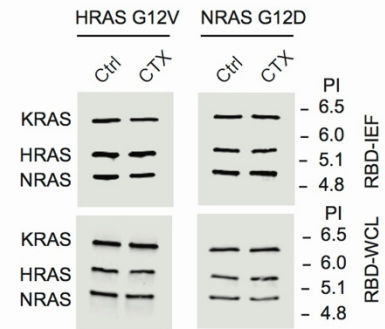**Figure S6**

**Figure S6. Supplementary data from the validation of identified EGFR inhibitor sensitive RAS mutants in additional model systems and RAS genes. Related to Figure 6.** (A) Colony formation assays for LS1034, SW1116, LS123, SW948, SW837 and SW1463 cells. Images are one representative experiment of three independent experiments (N=3). (B) Quantification of isoform specific RAS-GTP level from RBD-IEF. Data points and error bars represent mean  $\pm$  SD from three separate experiments (N=3), for which Figure 6C is a representative example. Statistical significance was determined by performing unpaired two-tailed t-test between untreated and treated conditions for each genotype. P\* indicates a significance of <0.05. (C) HEK293T cells were transfected with *NF1-NanoLuc* and with increasing concentrations of the indicated mutant *RAS-GFP*. Data represent BRET ratios  $\pm$  SD from eight biological replicates (n=8). BRET saturation curves are from one representative experiment. Three independent experiments were performed (N=3). (D) Proliferation assays for *HRAS* G12V and *NRAS* G12D SW48 isogenic cells. Data points represent mean  $\pm$  SD, and are representative of three separate experiments (N=3). (E) RBD-IEF and WCL-IEF of *HRAS* G12V and *NRAS* G12D SW48 isogenic cells cultured in untreated or treated conditions (20  $\mu$ g/ml of cetuximab for 48 hours). RBD-IEF and WCL-IEF are each representative of three independent experiments (N=3).
